# Supplementary material for: The Plant Pathogen Pseudomonas syringae pv. tomato Is Genetically Monomorphic and under Strong Selection to Evade Tomato Immunity
Source: PLoS Pathog. 2011 Aug 25;7(8):e1002130. doi: 10.1371/journal.ppat.1002130 (PMC3161960; doi:10.1371/journal.ppat.1002130)
Supplement: Table S3 — Estimation of times in years since most recent common ancestor of T1-like strains with Bayesian 95% Highest Posterior Density intervals assuming a yearly mutation rate per bp of 5×10–6. (XLS) [file ppat.1002130.s003.xls]

## Sheet: Sheet1
Table 3. Estimation of times in years since most recent common ancestor (tmrca) of T1-like strains with Bayesian 95% Highest Posterior Density (HPD) intervals assuming a yearly mutation rate per bp of 5 x 10-6.
Mrca of strains	tmrca IMa2	tmrca Beast
Max4, K40	91	260
95% HPD interval	2-194	184-335
Max4, K40, LNPV17.41	169	273
95% HPD interval	58-264	197-348
Max4, K40, LNPV17.41,T1	240	305
95% HPD interval	147-340	224-384
Max4, K40, LNPV17.41,T1,NCPPB1108	884	1117
95% HPD interval	283-1382	827-1415
