# Supplementary material for: The Plant Pathogen Pseudomonas syringae pv. tomato Is Genetically Monomorphic and under Strong Selection to Evade Tomato Immunity
Source: PLoS Pathog. 2011 Aug 25;7(8):e1002130. doi: 10.1371/journal.ppat.1002130 (PMC3161960; doi:10.1371/journal.ppat.1002130)
Supplement: Table S5 — List of strains with continent and year of isolation, MLST genotype, SNP genotype, and results for several virulence factors based on PCR (and sequencing of PCR products for hopM1). (XLS) [file ppat.1002130.s005.xls]

## Sheet: strains_10_window_T1_DC3000_JL1
Supplementary Table 5: List of strains with continent and year of isolation, MLST genotype, SNP genotype, and results for several virulence factors based on PCR (and sequencing of PCR products for hopM1)
ID	name	Continent	Year	MLST genotype	SNP genotype	hopM1 allele	Coronatine	avrRps4	avrD1	avrPto
1005	ICMP 4325	N. America	1944	DC3000	-	DC3000	+	-	+	+
1	DC3000	Europe	1961	DC3000	-	DC3000	+	-	-	+
1016	NCPPB 1008	N. America	1942	JL1065	-	JL1065	-	-	-	+
1347	CFBP 1696	Europe	1949	JL1065	-	JL1065	ND	ND	ND	ND
1007	NCPPB 880	Europe	1953	JL1065	-	JL1065	-	-	-	+
1009	ICMP 2846	N. America	1956	JL1065	-	JL1065	-	-	-	+
1346	CFBP 1319	Europe	1970	JL1065	-	JL1065	ND	ND	ND	ND
1348	CFBP 1785	Australia	1972	JL1065	-	JL1065	ND	ND	ND	ND
1015	ICMP 3647	Australia	1973	JL1065	-	JL1065	+	-	-	+
1017	ICMP 4355	Australia	1975	JL1065	-	JL1065	+	+	+	+
22	JL1065	N. America	1983	JL1065	-	JL1065	+	+	+	+
920	BS118	N. America	1983	JL1065	-	JL1065	+	+	+	+
922	BS120	N. America	1983	JL1065	-	JL1065	+	+	+	+
293	DC84-1	N. America	1984	JL1065	-	JL1065	+	+	+	+
300	PST26L	Africa	1986	JL1065	-	JL1065	+	-	+	+
1349	CFBP 3728	Asia	1988	JL1065	-	JL1065	ND	ND	ND	ND
49	PT 28	N. America	1992	JL1065	-	JL1065	-	-	+	+
50	PT 29	N. America	1992	JL1065	-	JL1065	+	+	+	+
1013	CPST 147	Europe	1993	JL1065	-	JL1065	-	-	+	+
1246	B64 or 56	N. America	1995	JL1065	-	JL1065	ND	ND	ND	+
1224	Pst field 8	N. America	1999	JL1065	-	JL1065	ND	ND	ND	ND
634	KS 112 lr	Africa	2004	JL1065	-	JL1065	+	+	+	+
635	KS 097 lr	Africa	2004	JL1065	-	JL1065	+	+	+	+
226	NCPPB 1108	Europe	1961	T1	NCPPB1108	1108	-	-	-	+
299	CFBP 1318	Europe	1969	T1	CFBP1318	T1	+	+	+	+
1008	NCPPB 2424	Europe	1969	T1	CFBP1318	T1	+	+	+	+
1333	CFBP 1321	Europe	1970	T1	CFBP1318	T1	ND	ND	ND	ND
1334	CFBP 1322	Europe	1970	T1	CFBP1318	T1	ND	ND	ND	ND
1335	CFBP 1323	Europe	1971	T1	NCPPB1108	PT21	ND	ND	ND	ND
1337	CFBP 1426	Europe	1972	T1	CFBP1318	T1	ND	ND	ND	ND
1338	CFBP 1427	Europe	1972	T1	CFBP1318	T1	ND	ND	ND	ND
1011	DAR 31861	Australia	1975	T1	NCPPB1108	PT21	+	+	+	+
297	SM78-1	N. America	1978	T1	T1	T1	+	+	+	+
1341	CFBP 2545	Europe	1978	T1	CFBP2545	T1	ND	ND	ND	ND
43	PT 14	N. America	1978	T1	PT14	T1	+	+	-	+
1012	DAR 30555	Australia	1978	T1	PT14	T1	+	+	+	+
1339	CFBP 1916	N. America	1978	T1	PT14	T1	ND	ND	ND	ND
1340	CFBP 1918	N. America	1978	T1	PT14	T1	ND	ND	ND	ND
301	487	Europe	1979	T1	CFBP1318	T1	+	-	+	+
1345	CFBP 6876	Europe	1979	T1	CFBP2545	T1	ND	ND	ND	ND
298	AV80	N. America	1980	T1	T1	T1	+	+	-	+
152	PST 6	N. America	1980	T1	PT14	T1	-	-	-	+
155	PT 18	N. America	1980	T1	PT14	T1	-	+	+	-
158	B181	N. America	1981	T1	PT14	T1	+	+	+	-
294	DCT6D1	N. America	1981	T1	PT14	T1	+	+	+	+
296	188B	N. America	1982	T1	T1	T1	+	+	+	-
919	BS117	N. America	1982	T1	PT14	T1	+	+	+	+
153	PT 17	N. America	1983	T1	T1	T1	+	+	+	+
154	PT 2	N. America	1983	T1	PT14	T1	+	+	+	+
1342	CFBP 4408	Europe	1984	T1	CFBP1318	T1	ND	ND	ND	ND
1006	RG4	S. America	1985	T1	CFBP1318	T1	+	-	+	+
156	T1	N. America	1986	T1	T1	T1	-	-	+	-
1343	CFBP 4409	Europe	1987	T1	CFBP1318	T1	ND	ND	ND	ND
295	DC89-4H	N. America	1989	T1	PT14	T1	+	+	+	+
45	PT 21	N. America	1990	T1	NCPPB1108	PT21	+	+	+	+
48	PT 26	N. America	1990	T1	NCPPB1108	PT21	+	+	+	+
46	PT 23	N. America	1990	T1	LNPV17.41	T1	+	+	+	+
47	PT 25	N. America	1990	T1	LNPV17.41	T1	+	+	+	+
19	OMP-BO 407/91	Europe	1991	T1	LNPV17.41	T1	+	+	+	+
1014	CPST 236	Europe	1993	T1	PT14	T1	-	-	+	+
52	PT 32	N. America	1993	T1	LNPV17.41	T1	+	+	+	+
854	IPV-CT28.31	Europe	1995	T1	IPV-CT28.31	T1	-	+	+	+
14	IPV-BO 2973	Europe	1996	T1	PT14	T1	+	+	-	+
638	OMP-BO 443.1/96	Europe	1996	T1	PT14	T1	+	+	+	+
20	LNPV 17.41	Europe	1996	T1	LNPV17.41	T1	+	+	+	+
824	A9	N. America	1996	T1	LNPV17.41	T1	+	+	+	-
1344	CFBP 5420	Europe	1996	T1	LNPV17.41	T1	ND	ND	ND	ND
825	407	N. America	1997	T1	LNPV17.41	T1	+	+	+	-
1244	CA315	N. America	1998	T1	CA315	PT21	+	+	+	+
17	LNPV 18.76	Europe	1998	T1	LNPV17.41	T1	+	+	+	+
826	838-1	N. America	1998	T1	LNPV17.41	T1	+	+	+	-
1245	316 or 55	N. America	1998	T1	LNPV17.41	T1	+	+	+	+
1223	Pst field 6	N. America	1999	T1	PT14	T1	+	+	+	ND
1218	Pst field 1	N. America	1999	T1	LNPV17.41	T1	+	+	+	ND
1219	Pst field 2	N. America	1999	T1	LNPV17.41	T1	+	+	+	ND
1220	Pst field 3	N. America	1999	T1	LNPV17.41	T1	+	+	+	ND
1221	Pst field 4	N. America	1999	T1	LNPV17.41	T1	+	+	+	ND
1222	Pst field 5	N. America	1999	T1	LNPV17.41	T1	+	+	+	ND
1247	B98 or 57	N. America	1999	T1	LNPV17.41	T1	+	+	+	+
640	ISCI 181	Europe	2002	T1	IPV-CT28.31	T1	+	+	+	+
8	Max 1	Europe	2002	T1	LNPV17.41	T1	-	-	-	+
11	Max 4	Europe	2002	T1	LNPV17.41	T1	+	+	+	+
12	Max 5	Europe	2002	T1	LNPV17.41	T1	+	+	-	+
13	Max 6	Europe	2002	T1	LNPV17.41	T1	-	+	-	+
10	ISCI 78	Europe	2003	T1	LNPV17.41	T1	+	+	-	+
632	KS P 53	Africa	2004	T1	KSP53	T1	-	-	+	+
633	KS 127 M	Africa	2004	T1	KSP53	T1	-	-	+	+
639	ISCI 284	Europe	2004	T1	IPV-CT28.31	T1	+	+	+	+
852	ISCI 286	Europe	2004	T1	IPV-CT28.31	T1	-	+	+	+
853	ISCI 269	Europe	2004	T1	IPV-CT28.31	T1	+	+	+	+
40	K40	N. America	2005	T1	LNPV17.41	T1	+	+	+	+
41	K41	N. America	2005	T1	LNPV17.41	T1	+	+	+	+
100	K100	N. America	2005	T1	LNPV17.41	T1	+	+	+	+
827	CA838-4	N. America	2005	T1	LNPV17.41	T1	+	+	+	-
828	CA838-16	N. America	2005	T1	LNPV17.41	T1	+	+	+	+ (mut.)
1178	CA836-2	N. America	2005	T1	LNPV17.41	T1	+	+	+	-
1181	CA838-8	N. America	2005	T1	LNPV17.41	T1	+	+	+	-
1182	CA838-9	N. America	2005	T1	LNPV17.41	T1	+	+	+	-
1183	CA838-6	N. America	2005	T1	LNPV17.41	T1	+	+	+	-
1020	-	N. America	2008	T1	LNPV17.41	T1	-	-	+	+
1021	-	N. America	2008	T1	LNPV17.41	T1	-	-	+	+
1186	CA410	N. America	2008	T1	LNPV17.41	T1	+	+	+	-
1191	CA20	N. America	2008	T1	LNPV17.41	T1	+	+	+	-
1192	CA21	N. America	2008	T1	LNPV17.41	T1	+	+	+	-
1193	CA22	N. America	2008	T1	LNPV17.41	T1	+	+	+	-
1188	CA16	N. America	2008	T1	LNPV17.41	T1	+	+	+	-
Col3	Colombia198	S. America	2009	T1	Colombia198	T1	ND	ND	ND	ND
Col6	Colombia201	S. America	2008	T1	Colombia198	T1	ND	ND	ND	ND
Col8	Colombia204	S. America	2009	T1	Colombia198	T1	ND	ND	ND	ND
Col1	Colombia338	S. America	2009	T1	Colombia338	T1	ND	ND	ND	ND
Col2	Colombia196	S. America	2009	T1	Colombia338	T1	ND	ND	ND	ND
Col4	Colombia199	S. America	2009	T1	Colombia338	T1	ND	ND	ND	ND
ND: not determined
